# Supplementary material for: Maternal smoking DNA methylation risk score associated with health outcomes in offspring of European and South Asian ancestry
Source: eLife journal article supplement (doi:10.7554/elife.93260), 2024-01-08

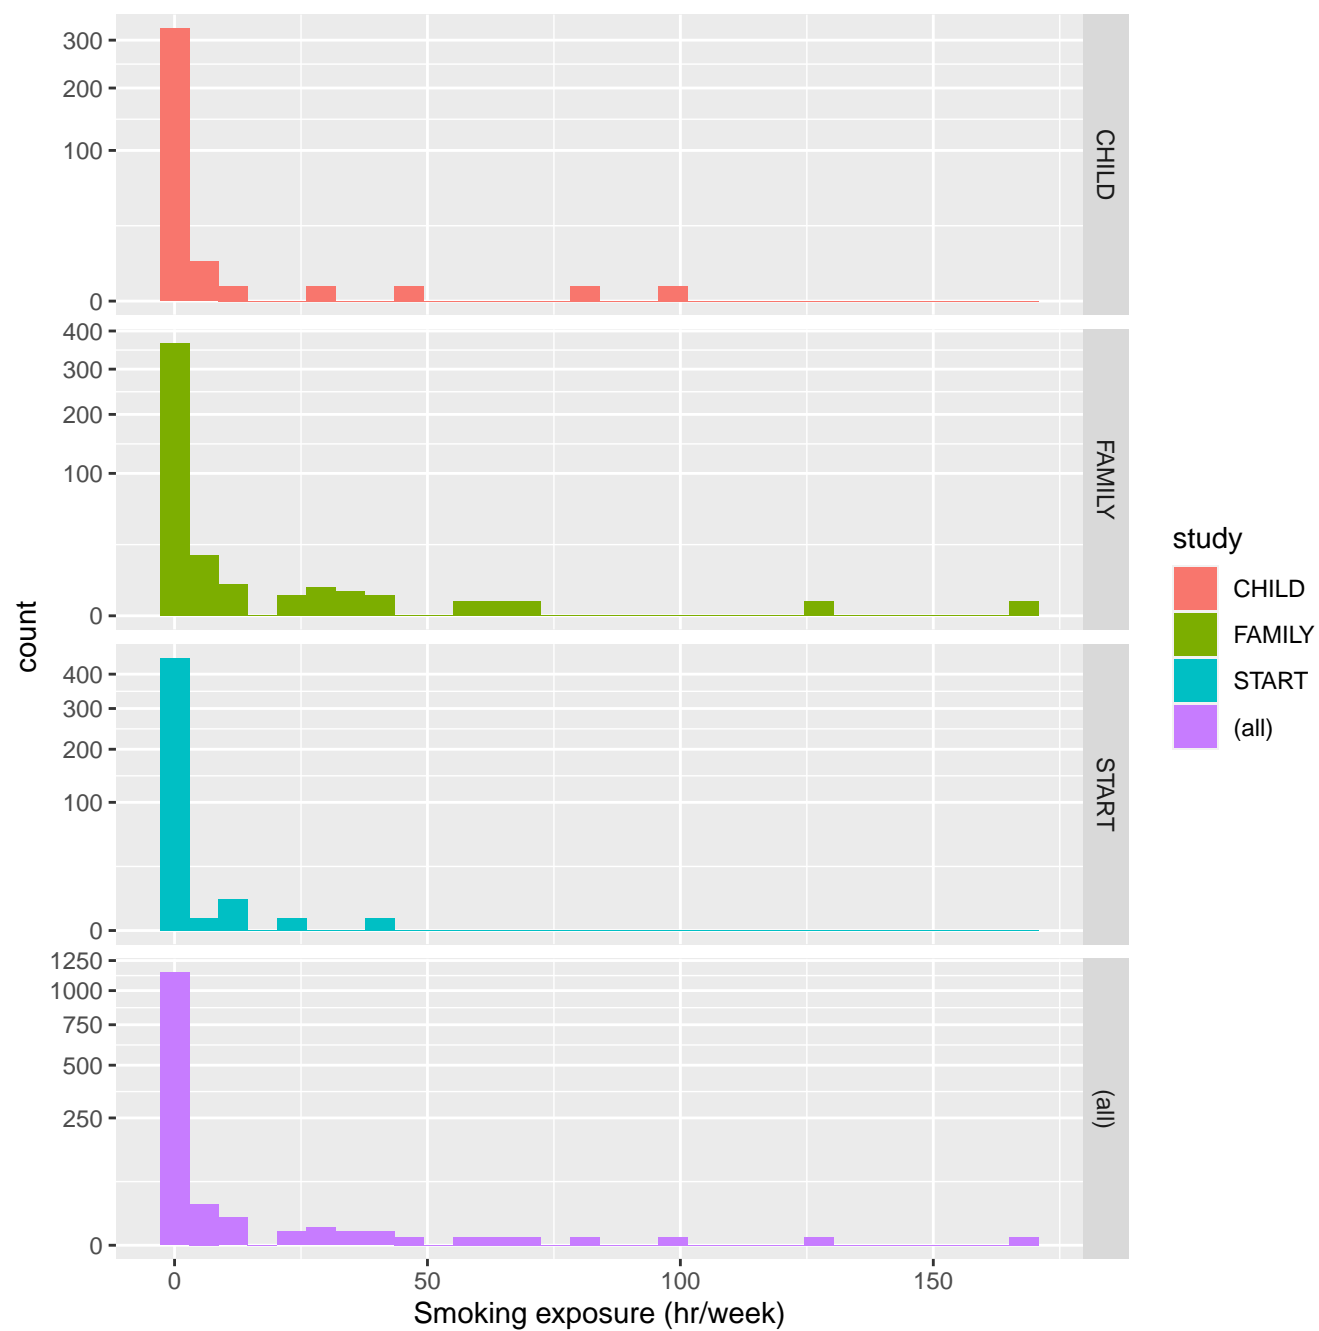

Supplement: fig2-data1 [file elife-93260-fig2-data1-v1.pdf]
